# Supplementary material
Source: Research Square preprint supplement (doi:10.21203/rs.3.rs-8940567/v1)
Supplement: Supplementary file 1 [file fda4eba912bed8859303f63d.docx]

Appendix A

Table A1. Individual crime type effect measures.

| **Outcome** | **ATT** | **SE** | **95 % CI** | **P-value** |
| --- | --- | --- | --- | --- |
| Robbery | 0.0007 | 0.0002 | [0.0003, 0.0011] | <0.001 |
| Assault | -0.0020 | 0.0041 | [-0.0101, 0.0061] | 0.634 |
| Vehicle | -0.0018 | 0.0041 | [-0.0098, 0.0063] | 0.670 |
| Vandalism | -0.0011 | 0.0076 | [-0.0160, 0.0138] | 0.884 |
| Total (excluding bicycle theft) | -0.0041 | 0.0098 | [-0.0234, 0.0151] | 0.673 |

*Notes.* Alternate effect measures (ATT) for individual crime types including standard errors, confidence intervals and p-values.

Table A2. Outdoor crime levels in treatment, control and buffer zones.

| **Year** | **Treated** | **Buffer 0–200 m** | **Buffer 200–500 m** | **Control** |
| --- | --- | --- | --- | --- |
| 2019 | 366 | 1,179 | 1,924 | 1,707 |
| 2020 | 611 | 1,353 | 2,186 | 2,112 |
| 2021 | 677 | 1,240 | 1,850 | 1,961 |
| 2022 | 644 | 1,117 | 1,637 | 1,392 |
| 2023 | 491 | 1,127 | 1,827 | 1,502 |
| *Notes*. Descriptive displacement analysis based on geocoded crime incidents. Buffer zones are cluster-based and mutually exclusive (0–200 m, 200–500 m). Crimes at treated and control public housing addresses are prioritised and excluded from buffer counts. Counts are annual totals for 2019–2023. | | | | |

Table A3. Summary of LOO estimates.

| **Model** | **Main ATT** | **LOO range** | **Significant LOO iterations** |
| --- | --- | --- | --- |
| Model A (within neighbourhoods) | -0.007 | [-0.011, 0.001] | – |
| Model B (external controls) | -0.007 | [-0.013, 0.001] | – |
| Note. Leave-one-out (LOO) estimates are obtained by iteratively excluding one treated neighbourhood at a time. The table reports the range of ATT estimates across iterations. Dashes indicate that no statistically significant estimates were observed (95% CI not including zero). | | | |
